# Supplementary material for: Misinformation, Fears and Adherence to Preventive Measures during the Early Phase of COVID-19 Pandemic: A Cross-Sectional Study in Poland
Source: MDPI journal article supplement (doi:10.3390/ijerph182212266), 2021-11-22
Supplement: s1 [file s1]

## **Supplementary material for**

# **" Misinformation, fears and adherence to preventive measures during the early phase of COVID-19 pandemic: A cross-sectional study in Poland"**

**Bartosz M. Nowak, Cezary Miedziarek, Szymon Pełczyński, Piotr Rzymski**

## ***Translated Questionnaire***

### **Demographic data**

**Your gender:**

- Woman
- Man
- Other

**Your age (in years): .....**

**Your level of education:**

- Primary education
- Vocational education
- Secondary education (non-medical)
- Secondary education (medical)
- During higher education (non-medical)
- During higher education (medical)
- Higher education (non-medical)
- Higher education (medical)

**Place of living, where you spend most of your life:**

- Village
- City up to 25 000 inhabitants
- A city with 25 000 and 100 000 inhabitants
- A city with 100 000 and 200 000 inhabitants
- A city with 200 000 and 500 000 inhabitants
- A city with over 500 000 inhabitants

**Do you have any children?**

- Yes
- No

### Adherence to preventive measures

**Please indicate whether you adhere to the following preventive measures recommended during the COVID-19 pandemic:**

- **Frequent hand washing**
  - Yes
  - No
- **Avoiding face touching**
  - Yes
  - No
- **Avoiding handshake**
  - Yes
  - No
- **Covering mouth when coughing or sneezing**
  - Yes
  - No
- **Using disinfection**
  - Yes
  - No

## Fears related to COVID-19 pandemics

**Please assess your level of fear related to the following COVID-19 pandemic aspects**  
(Scale 1 to 10, where 1- no fear, 5 - a medium level of fear, 10 - very high level of fear)

[illegible]

## **Conspiracy theories on COVID-19**

**Please indicate whether you believe that the COVID-19 pandemic was induced by the 5G network?**

- Yes
- No

**Please indicate whether you believe that the COVID-19 pandemic was induced by the Chinese government to weaken other economies?**

- Yes
- No

**Please indicate whether you believe that the COVID-19 pandemic was induced to weaken the Chinese economy?**

- Yes
- No

**Please indicate whether you believe that the COVID-19 pandemic was induced for profits of pharmaceutical companies from selling vaccines**

- Yes
- No
